# Supplementary material for: Coexisting properties of thermostability and ultraviolet radiation resistance in the main S-layer complex of Deinococcus radiodurans
Source: Royal Society of Chemistry journal article supplement (doi:10.1039/c7pp00240h), 2017-11-27
Supplement: c7pp00240h1.pdf [file c7pp00240h1.pdf]

**Sup. Fig. 1:** Comparison between the absorption spectrum of a pure SDBC sample in buffer and the Sun spectrum at the Earth's surface (AM 1.5) and on the top of the atmosphere (AM 0).

**Sup. Fig. 2:** Comparison of the excitation and emission spectra of SDBC sample in buffer with the Sun spectrum at the Earth's surface (AM 1.5) and on the top of the atmosphere (AM 0). For the SDBC the emission spectrum was recorded using the main excitation bands (233 nm and 279 nm), while the excitation spectrum was recorded with emission at 325 nm.
